# Supplementary material for: Identification and Characterization of PTE-2, a Stowaway-like MITE Activated in Transgenic Chinese Cabbage Lines
Source: MDPI journal article supplement (doi:10.3390/genes13071222), 2022-07-08
Supplement: s1 [file s1]

**Table S1.** List of primer sets for MITE insertion polymorphism (MIP) PCR analysis.

| MITE name        | Primer name                 | Primer sequence (5'→3')    | Inserted size (bp) | Excised size (bp) |
|------------------|-----------------------------|----------------------------|--------------------|-------------------|
| <i>PTE-2</i>     | <i>PTE-2</i> F <sup>Z</sup> | TATACATGACGAGTATACGAGGG    | 835                | 562               |
|                  | <i>PTE-2</i> R              | CCACAAGTGATCGTTGTCTAG      |                    |                   |
| <i>PTE-2_c1</i>  | <i>PTE-2_c1</i> F           | CATGTAGATTTACCCCAACG       | 631                | 394               |
|                  | <i>PTE-2_c1</i> R           | CGCCTAGTCTCAACTTCAAA       |                    |                   |
| <i>PTE-2_c2</i>  | <i>PTE-2_c2</i> F           | CACGATGATGGCGAGATTATT      | 749                | 513               |
|                  | <i>PTE-2_c2</i> R           | TGTTGAACTATGACCGAGTGG      |                    |                   |
| <i>PTE-2_c3</i>  | <i>PTE-2_c3</i> F           | TTGGTATGCATGAATGGCAC       | 679                | 449               |
|                  | <i>PTE-2_c3</i> R           | GGTACCTGCTTGGTGTACATT      |                    |                   |
| <i>PTE-2_c4</i>  | <i>PTE-2_c4</i> F           | ATTGTACCAGAAAAGATGTATATT   | 618                | 356               |
|                  | <i>PTE-2_c4</i> R           | GTCAAGTTCATTTACATACTC      |                    |                   |
| <i>PTE-2_c5</i>  | <i>PTE-2_c5</i> F           | GCCACACGAGCCTGATGC         | 727                | 477               |
|                  | <i>PTE-2_c5</i> R           | GCGGTGATGTTTAATCCAGCG      |                    |                   |
| <i>PTE-2_c6</i>  | <i>PTE-2_c6</i> F           | GCCCAACAACAACAATAATAAT     | 730                | 500               |
|                  | <i>PTE-2_c6</i> R           | CCGAATCCAGATCCAGGT         |                    |                   |
| <i>PTE-2_c7</i>  | <i>PTE-2_c7</i> F           | AGACCCTAAGTGTAATCAA        | 595                | 358               |
|                  | <i>PTE-2_c7</i> R           | AAAGATAAAGATGTAGAGTTGTT    |                    |                   |
| <i>PTE-2_c8</i>  | <i>PTE-2_c8</i> F           | TGCATGAATGATTATGTCGAT      | 749                | 511               |
|                  | <i>PTE-2_c8</i> R           | GGAATGTGAGTAGTATGAAG       |                    |                   |
| <i>PTE-2_c9</i>  | <i>PTE-2_c9</i> F           | CATCTCTATTTCTCTATTTCCAA    | 353                | 112               |
|                  | <i>PTE-2_c9</i> R           | TGGAAATAGAGGTGGAATA        |                    |                   |
| <i>PTE-2_c10</i> | <i>PTE-2_c10</i> F          | TCTCTATGAATCCCAACTTA       | 909                | 679               |
|                  | <i>PTE-2_c10</i> R          | CTTTCAGTAGGGTAGCAT         |                    |                   |
| <i>PTE-2_c11</i> | <i>PTE-2_c11</i> F          | CTAATCGCCACATAAACTAACC     | 528                | 283               |
|                  | <i>PTE-2_c11</i> R          | TAACACGAGAGTAGTCAATAGG     |                    |                   |
| <i>PTE-2_c12</i> | <i>PTE-2_c12</i> F          | GAAACCAGAGAAACACCATAC      | 775                | 548               |
|                  | <i>PTE-2_c12</i> R          | TGTGAAATGTTCTGGTTACTCTT    |                    |                   |
| <i>PTE-2_c13</i> | <i>PTE-2_c13</i> F          | TTC AAT AGT AGT TCA CCG    | 478                | 238               |
|                  | <i>PTE-2_c13</i> R          | TTC ATC TTG TAA TCT GTA AT |                    |                   |
| <i>PTE-2_c14</i> | <i>PTE-2_c14</i> F          | CTCCTACTTCATCTCTTCAAG      | 840                | 569               |
|                  | <i>PTE-2_c14</i> R          | CTAACTTCTGTTACAGTCAATG     |                    |                   |

<sup>Z</sup>F, forward primer; R, reverse primer

**Table S2.** Distribution of MITE family in 'CT001' genome.

|     | 1kup <sup>z</sup> | Intron | Exon | 1kdn <sup>y</sup> | Intergenic | Total   |
|-----|-------------------|--------|------|-------------------|------------|---------|
| DTH | 28,546            | 9,159  | 808  | 18,945            | 67,419     | 124,877 |
| DTA | 1,269             | 564    | 44   | 735               | 2,847      | 5,459   |
| DTC | 6                 | 6      | 0    | 17                | 96         | 125     |
| DTM | 1,798             | 426    | 7    | 765               | 2,041      | 5,037   |
| DTT | 35,682            | 13,859 | 114  | 22,786            | 72,562     | 145,003 |

<sup>z</sup>: 1kup, 1k bp upstream from gene locus. <sup>y</sup>:1kdn, 1k bp downstream from gene locus.
